# Supplementary material for: Cell Sheets Restore Secretory Function in Wounded Mouse Submandibular Glands
Source: MDPI journal article supplement (doi:10.3390/cells9122645), 2020-12-09
Supplement: s1 [file s1]

# Supplementary Materials

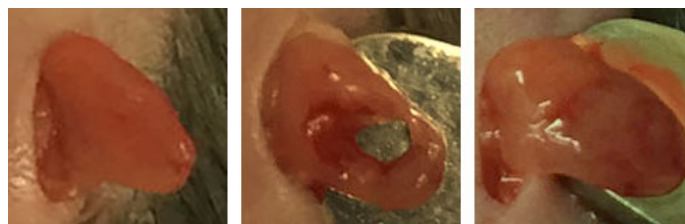

**Figure 1.** Cell sheets can be directly transplanted and attached to the wound site. Adapted with permission from [1] Copyright © 2019, npj Regenerative Medicine.

## References

1. Nam, K.; Kim, K.; Dean, S.M.; Brown, C.T.; Davis, R.S.; Okano, T.; Baker, O.J. Using cell sheets to regenerate mouse submandibular glands. *NPJ Regen Med* **2019**, *4*, 16, doi:10.1038/s41536-019-0078-3.

**Publisher's Note:** MDPI stays neutral with regard to jurisdictional claims in published maps and institutional affiliations.

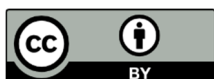

© 2020 by the authors. Licensee MDPI, Basel, Switzerland. This article is an open access article distributed under the terms and conditions of the Creative Commons Attribution (CC BY) license (<http://creativecommons.org/licenses/by/4.0/>).
